# Supplementary material for: Changes in gene expression and apoptotic response in Spodoptera exigua larvae exposed to sublethal concentrations of Vip3 insecticidal proteins
Source: PubMed Central journal article supplement (PMC5701239; doi:10.1038/s41598-017-16406-1), 2017-11-24
Supplement: 41598_2017_16406_MOESM1_ESM.pdf [file 41598_2017_16406_MOESM1_ESM.pdf]

## Supplementary material

Changes in gene expression and apoptotic response in  
*Spodoptera exigua* larvae exposed to sublethal  
concentrations of Vip3 insecticidal proteins

Patricia Hernández-Martínez, Joaquín Gomis-Cebolla, Juan Ferré and Baltasar Escriche\*

ERI de Biotecnología y Biomedicina (BIOTECMED), Department of Genetics, Universitat de València. Dr Moliner, 50, Burjassot (46100), Spain.

**Supplementary Information:**

**Supplementary Figure 1.** Venn diagram showing up-regulated genes (panel a) and down-regulated genes (panel b) after 24 h challenged at 100, 1000, and 10000 ng/cm<sup>2</sup> of Vip3Ca.

**Supplementary Figure 2.** Correlation analysis between larval growth inhibition and the APN activity in the luminal fluid after exposure to four different concentrations of Vip3Ca protein for 24 h. Pearson r and p-value are shown in the graph.

**Supplementary Figure 3.** Midgut tissue sections of *S. exigua* exposed for 24 h to Vip3Aa and Vip3Ca proteins were stained with hematoxylin and eosin. As controls, larvae fed with the empty vector (WK6) were used. Magnification was 100×. BM, basal membrane; AM, apical membrane and L, lumen.

**Supplementary Table S1.** List of primers for RT-qPCR used in this study and gene expression of each transcript after Vip3Ca challenged at 100, 1000, and 10000 ng/cm<sup>2</sup>, respectively.

**Supplementary Table S2.** List of primers designed for the analysis of the expression levels of five apoptosis-related genes.

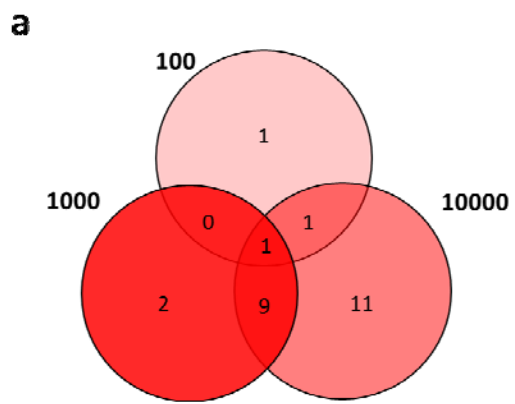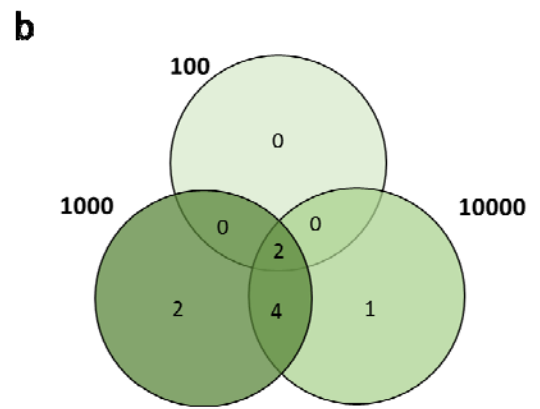

**Supplementary Figure 1.**

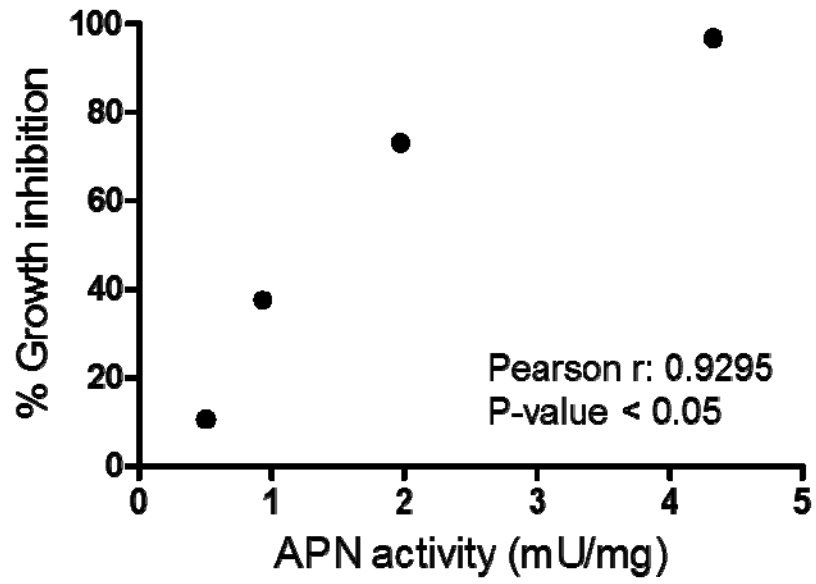

Supplementary Figure 2.

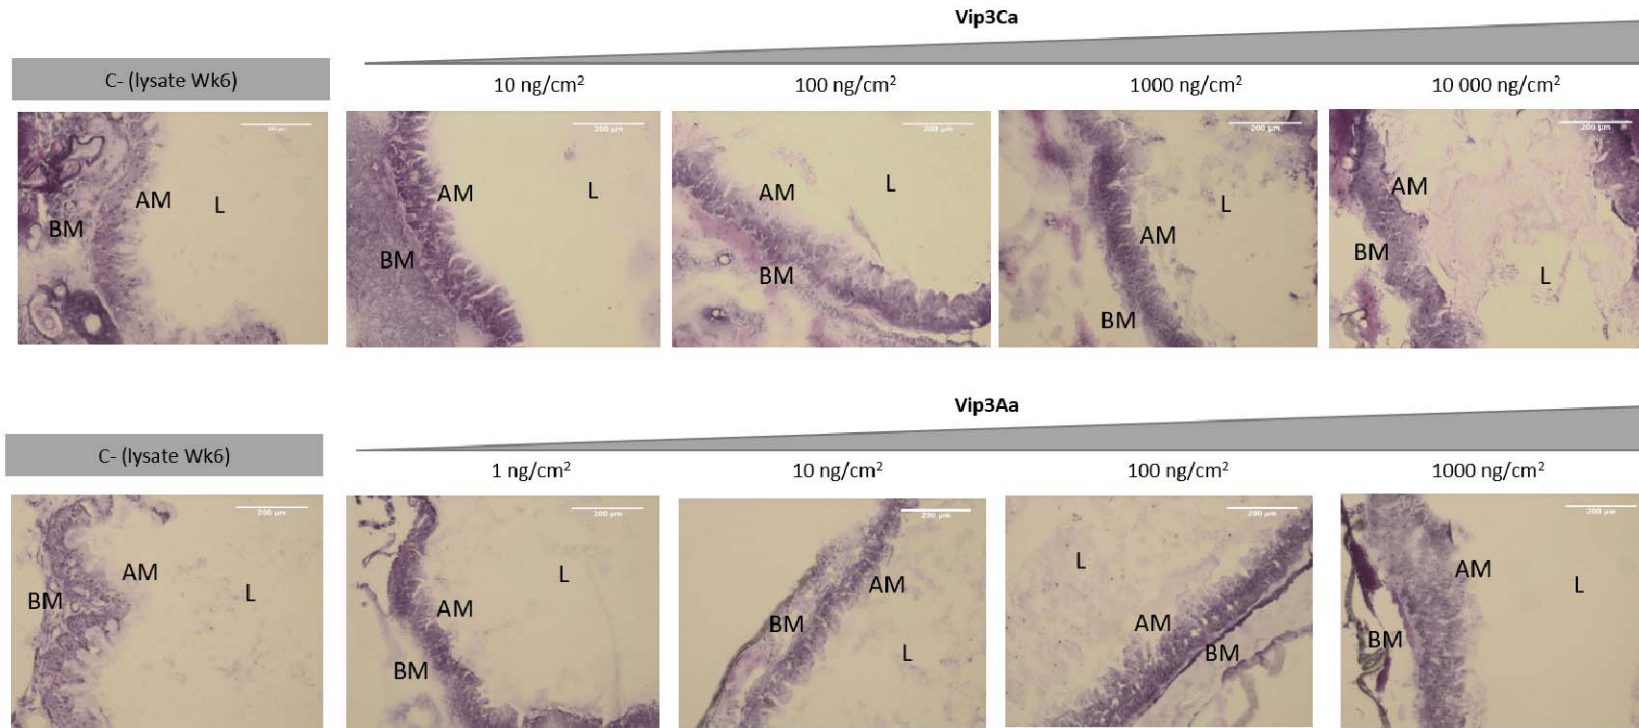

**Supplementary Figure 3.**

Supplementary Table S1: List of primers for RT-qPCR used in this study and gene expression of each transcript after Vip3Ca challenged at 100, 1000, and 10000 ng/cm<sup>2</sup>, respectively.

| Number of pair of primer | Target gene                               | Primers                     |                            | Source                  | Fold change ± SD              |                                |                                  |
|--------------------------|-------------------------------------------|-----------------------------|----------------------------|-------------------------|-------------------------------|--------------------------------|----------------------------------|
|                          |                                           | Forward (5' → 3')           | Reverse (5' → 3')          |                         | expose 100 ng/cm <sup>2</sup> | expose 1000 ng/cm <sup>2</sup> | expose 10 000 ng/cm <sup>2</sup> |
| 1                        | <i>ATP synthase</i>                       | GTTGCTGGTCTGGTGGATT         | AGGCCCTAGACACCATTGAAA      | Herrero et al., 2007    | -                             | -                              | -                                |
| 2                        | <i>Beta-glucan recognition protein</i>    | AATTGGAAGCCATCTACTCTAAAGG   | TGAGGTTTCCGTGGAATGC        | Jakubowska et al., 2013 | 0.8 ± 0.6                     | 5.0 ± 3.9*                     | 2.7 ± 2.8                        |
| 3                        | <i>Peptidoglycan recognition protein</i>  | GTAGTACCCGAGTGTGTAGTGATGAG  | TTGCTCTATATCAGTGAATCCACGTT | Jakubowska et al., 2013 | 1.1 ± 0.8                     | 1.7 ± 1.7                      | 3.5 ± 4.4                        |
| 4                        | <i>Prophenoloxidase activating enzyme</i> | AGCTGTGCGGCCAGAT            | TCGACCCGCAACATTCACAT       | Jakubowska et al., 2013 | 1.1 ± 0.7                     | 3.0 ± 2.6                      | 3.5 ± 3.6                        |
| 5                        | <i>G-protein receptor</i>                 | GGCCGTCAGTGTGAAGAATATTAAGT  | ACGGGAACAGCAAATTTGTTGT     | Jakubowska et al., 2013 | 1.3 ± 0.6                     | 0.8 ± 0.9                      | 1.0 ± 0.8                        |
| 6                        | <i>TIN-ag-RP</i>                          | CGATGACTGTTGCCAGACTAC       | TGCAGCCCATGGTGTATATTC      | Jakubowska et al., 2013 | 0.8 ± 0.4                     | 1.9 ± 1.7                      | 2.6 ± 1.7                        |
| 7                        | <i>Toll receptor</i>                      | TTCTTTAGTCTTTCCAGAACATTGG   | ACCTGATGCTGACAAAGACCTACA   | Jakubowska et al., 2013 | 1.3 ± 0.7                     | 0.3 ± 0.4                      | 0.8 ± 0.5                        |
| 8                        | <i>Imd</i>                                | GCTCCAAGGCCATCTACAGAGA      | TCCTGATCTTCATTTGATCTTGATT  | Jakubowska et al., 2013 | 1.1 ± 1.1                     | 0.06 ± 0.2                     | 0.5 ± 0.3                        |
| 9                        | <i>JAK-STAT</i>                           | CGCCCTTACAGGATCATCTCA       | AGGCCGGATTCTAGGAGCTT       | Jakubowska et al., 2013 | 0.7 ± 0.4                     | 0.4 ± 0.2*                     | 0.5 ± 0.3                        |
| 10                       | <i>SE_U12696 (REVIP)</i>                  | GGTCCAATTCCAACATGCACCT      | TGTAGGCTTTGTGAACGTGGTGT    | Bel et al., 2013        | 0.1 ± 0.1*                    | 0.0015 ± 0.0014*               | 0.006 ± 0.0033*                  |
| 11                       | <i>SE_U12832</i>                          | ACTGGTGCAGTCCGAGCAT         | AGCCCAATACTGTGTCCTCA       | Bel et al., 2013        | 0.4 ± 0.3*                    | 0.07 ± 0.04*                   | 0.09 ± 0.06*                     |
| 12                       | <i>SE_U59986</i>                          | GCCATTGCCCTTACCTTCTGG       | GCTTCCAACAAAGTTCTCGTTGA    | Bel et al., 2013        | 0.7 ± 0.4                     | 0.07 ± 0.05*                   | 0.06 ± 0.03*                     |
| 13                       | <i>SE_U10224</i>                          | CGAAGGGAATGTTTGCGAAG        | AGTTCCGCTGACCAGAGAGTGC     | Bel et al., 2013        | 0.6 ± 0.4                     | 0.08 ± 0.04*                   | 0.2 ± 0.1*                       |
| 14                       | <i>SE_U08180</i>                          | ATTCCGCCGACCTCTTCAAT        | TGTTAGGATGAACTGGAACCATAAAC | Bel et al., 2013        | 0.6 ± 0.4                     | 0.06 ± 0.04*                   | 0.2 ± 0.1*                       |
| 15                       | <i>SE_U08346</i>                          | AGGTCATCTCCAGCTACGACG       | CGTTGCACGATTCAAATTCG       | Bel et al., 2013        | 0.6 ± 0.4                     | 0.06 ± 0.04*                   | 0.1 ± 0.07*                      |
| 16                       | <i>SE_U56776</i>                          |                             |                            | Bel et al., 2013        | 5.9 ± 3.6*                    | 11.0 ± 36.0                    | 29.3 ± 34.6*                     |
| 17                       | <i>SE_U20473</i>                          | CGGCCAAGAATTAGTTTCCAAA      | AGACCCGGTACTCTGGCGTA       | Bel et al., 2013        | 9.3 ± 6.9                     | 6.4 ± 3.5*                     | 6.9 ± 6.1*                       |
| 18                       | <i>SE_U33476</i>                          | CAGTACAATGGCCGCTCTCAA       | AAGGCAATGAGGAGCAGCAC       | Bel et al., 2013        | 0.8 ± 0.9                     | 9.8 ± 12.9                     | 19.3 ± 11.6*                     |
| 19                       | <i>SE_U17986</i>                          | CGAGTGCACCATGAACACCT        | ATGACGGCGGAGGAAAGAGAG      | Bel et al., 2013        | 1.8 ± 1.3                     | 19.2 ± 11.6*                   | 10.4 ± 8.9*                      |
| 20                       | <i>SE_U08322</i>                          | CCCGCTAAGAAATGACAGCTAAA     | TGATGCCCGTGGAAAGCTT        | Bel et al., 2013        | 8.8 ± 5.9*                    | 11.3 ± 5.6*                    | 6.7 ± 5.7*                       |
| 21                       | <i>SE_U08997</i>                          | CTCCCGAAGCTGAGACCT          | TGGTCTCCGGCTTTATTGGA       | Bel et al., 2013        | 1.4 ± 0.4                     | 1.4 ± 0.6                      | 2.3 ± 1.2*                       |
| 22                       | <i>SE_U13239</i>                          | TTGGGCATCAAGTCGCTAGA        | GTCCCCCTTGATCTCGTCAA       | Bel et al., 2013        | 2.9 ± 2.3                     | 20.9 ± 23.0*                   | 7.8 ± 5.6*                       |
| 23                       | <i>SE_U09334</i>                          | CAGTCGCCGGCCAAATAC          | CGGGCTCGGCTTTATAGAAC       | Bel et al., 2013        | 5.2 ± 3.6*                    | 3.2 ± 3.6                      | 1.8 ± 1.6                        |
| 24                       | <i>SE_U06544</i>                          | TCAAATTTCCAATAAAGCCGGA      | TCTCGTCTCAGCAATGTGC        | Bel et al., 2013        | 1.1 ± 1.0                     | 1.2 ± 1.1                      | 1.1 ± 1.0                        |
| 25                       | <i>Gloverin</i>                           | CGAGGTGGCTACAAACAAGAC       | CATATGCCTGGCCCTTGAAG       | Crava et al., 2015      | 1.1 ± 1.0                     | 4.2 ± 3.6                      | 31.7 ± 5.0*                      |
| 26                       | <i>Attacin 1</i>                          | GTCTCTTAGACCACAAGGAC        | CACGGAAGTGGTCCGGCT         | Crava et al., 2015      | 1.5 ± 2.3                     | 1.6 ± 2.6                      | 2.2 ± 2.0                        |
| 27                       | <i>Attacin 3</i>                          | CGGTTTATCAGCACCATTCCGGT     | CGCCTGGCAGCATCAAAG         | Crava et al., 2015      | 1.3 ± 1.6                     | 0.5 ± 0.7                      | 2.9 ± 2.6                        |
| 28                       | <i>Lebocin 1</i>                          | CACTACACCTGCCTGACTACA       | GGCGAGGTTGAAGGGA           | Crava et al., 2015      | 1.2 ± 1.6                     | 35.6 ± 19.5*                   | 14.7 ± 10.5*                     |
| 29                       | <i>Cecropin A1</i>                        | GTCTATCGTAATCATCACATCAACTAC | ACGGCAGGCAGTTGCTCAG        | Crava et al., 2015      | 0.2 ± 0.4                     | 1.9 ± 2.1                      | 1.2 ± 1.1                        |
| 30                       | <i>Cecropin B</i>                         | GGATAAGCTGGTCTCCAAACAC      | GTGTGCCAATTATTCGAGAAC      | Crava et al., 2015      | 1.3 ± 1.1                     | 5.2 ± 8.9                      | 2.5 ± 2.3*                       |
| 31                       | <i>Cecropin C</i>                         | CAGTGAGGAAGACTAGACGGC       | ATGGAGCGTATACAAATGAACG     | Crava et al., 2015      | 1.1 ± 0.9                     | 4.5 ± 7.0                      | 3.05 ± 2.8*                      |
| 32                       | <i>Cecropin D</i>                         | GCCAAAGCGCTAGGAAAGTAG       | TCTGTTGCTGACTATTGAAGTAGG   | Crava et al., 2015      | 0.6 ± 0.5                     | 3.2 ± 5.3                      | 2.7 ± 2.3                        |
| 33                       | <i>Cecropin E</i>                         | TGGCCGTTGTTGGGATCAG         | GTATGTGTCAGGTCATAGGGACT    | Crava et al., 2015      | 1.3 ± 1.1                     | 1.2 ± 1.9                      | 8.1 ± 8.3*                       |
| 34                       | <i>Cecropin F</i>                         | CCAAGGCGCTAGGATAAAC         | GGCGGAATGAGTATTATGAGGT     | Crava et al., 2015      | 1.1 ± 0.8                     | 0.9 ± 3.2                      | -2.2 ± 0.2                       |
| 35                       | <i>Spodoptericin</i>                      | TCGTGCGATTTCGAAGAAGC        | GCAGATGCCGTAAGTGAACCT      | Crava et al., 2015      | 3.4 ± 3.7                     | 10.2 ± 4.6*                    | 21.9 ± 28.4*                     |
| 36                       | <i>LYZ 1</i>                              | GAATCATGCAAAGCTAACGGT       | TGCCTCGCAATGCAAGCA         | Crava et al., 2015      | 0.8 ± 0.7                     | 3.0 ± 4.9                      | 2.2 ± 1.9*                       |
| 37                       | <i>LYZ 2</i>                              | GACGAATTGCGATTAGTTTAC       | GAGCACTCTCACTGTTTACCAGAC   | Crava et al., 2015      | 1.2 ± 0.9                     | 3.7 ± 6.5                      | 2.8 ± 2.1*                       |
| 38                       | <i>LYZ 3</i>                              | CCTAATTGAAGCGGAGGTTT        | GTGGGAACCGTCTGAATTCG       | Crava et al., 2015      | 1.4 ± 1.2                     | 2.4 ± 4.7                      | 11.1 ± 7.3*                      |
| 39                       | <i>LLP 1</i>                              | GCCTGATATTGAGAAATGTCCA      | CTTGCCGTTCTCTGTCTCTAGG     | Crava et al., 2015      | 0.5 ± 0.4                     | 0.5 ± 0.4                      | 0.5 ± 0.3*                       |
| 40                       | <i>LLP 2</i>                              | CGCGGTCCAGCACAAGAC          | CGCCTAGATCTTCTCAACCTGG     | Crava et al., 2015      | 1.1 ± 0.5                     | 0.8 ± 0.7                      | -2.0 ± 0.5                       |
| 41                       | <i>Diapausin A1</i>                       | GCCGTAGAATGGACTGTTACTGATG   | CAAGAAGGTTATCACGAATACG     | Crava et al., 2015      | 1.8 ± 1.4                     | 2.8 ± 2.8*                     | 21.6 ± 15.3*                     |
| 42                       | <i>Diapausin A2</i>                       | GCCGTAGAATGGACTGTTACTGATG   | GCAAGTCAGGAATACTAAAGGGC    | Crava et al., 2015      | 1.1 ± 0.6                     | 0.6 ± 0.6                      | 4.6 ± 4.0*                       |
| 43                       | <i>Diapausin A3</i>                       | GCCGTAGAATGGACTGTTACTGATG   | CTAGAGAGCTGCGTTGTTTAC      | Crava et al., 2015      | 2.2 ± 1.3                     | 0.8 ± 0.7                      | 29.0 ± 16.3*                     |
| 44                       | <i>Diapausin A6</i>                       | GCCGTAGAATGGACTGTTACTGATG   | ATTAGGTTTCTAGGCTTGTGTGAC   | Crava et al., 2015      | 3.1 ± 3.2                     | 39.5 ± 49.0*                   | 46.4 ± 38.8*                     |
| 45                       | <i>Diapausin A7</i>                       | GCCGTAGAATGGACTGTTACTGATG   | TAAGAAGATCCTCCACTACAAGG    | Crava et al., 2015      | 3.9 ± 3.4                     | 21.8 ± 16.4*                   | 46.5 ± 40.8*                     |
| 46                       | <i>Cobatoxin 1</i>                        | TCGAGGAGGTGGGAGATGTC        | CGAACGGCTGGAGACTCTTC       | Crava et al., 2015      | 0.8 ± 0.6                     | 5.3 ± 3.4*                     | 4.7 ± 6.9                        |
| 47                       | <i>Cobatoxin 2</i>                        | GAAGCTCGTATTGTTTGTCTG       | CCTCAGCAAGTCGTCAATG        | Crava et al., 2015      | 0.4 ± 0.2                     | 0.4 ± 0.2*                     | 0.8 ± 0.8                        |
| 48                       | <i>Moricin</i>                            | AAGCGGCTCCAGGAAAGATACC      | ATTGCCGGAGACCTTACCAA       | Crava et al., 2015      | 1.6 ± 1.6                     | 4.3 ± 2.8*                     | 6.2 ± 6.6*                       |

\* Genes whose expression was significantly up-(box in red) or down-regulated (box in green) after Vip3Ca challenge

Supplementary Table S2: List of primers design for the analysis of the expression levels of five apoptosis-related genes.

| Target gene         | Name           | Length | Tm | %GC | 5'-3' sequence          | Amp Length |
|---------------------|----------------|--------|----|-----|-------------------------|------------|
| <i>Se-Caspase-1</i> | Se-Caspase-1 F | 20     | 62 | 60  | GCTTGAAGTCGCGTACTGGC    | 137        |
|                     | Se-Caspase-1 R | 19     | 61 | 63  | GTCTGCAGTCTGCTGGACG     |            |
| <i>Se-Caspase-2</i> | Se-Caspase-2 F | 20     | 59 | 55  | ATCGATATCCCACCACGAGC    | 82         |
|                     | Se-Caspase-2 R | 21     | 58 | 48  | CAACACTAAATCCCAACGCTG   |            |
| <i>Se-Caspase-3</i> | Se-Caspase-3 F | 23     | 64 | 57  | CACATGCTGACTTCCTCGTGCTG | 122        |
|                     | Se-Caspase-3 R | 25     | 63 | 52  | CAGGTCCTCATGATGTTCTCCA  |            |
| <i>Se-Caspase-4</i> | Se-Caspase-4 F | 22     | 60 | 55  | CGAGGTACGAAGATCACCCAAG  | 111        |
|                     | Se-Caspase-4 R | 21     | 60 | 57  | GAGATCAGACTCCACTGGCAG   |            |
| <i>Se-Caspase-6</i> | Se-Caspase-6 F | 20     | 59 | 55  | GAAGTCTCCTTACCTGCCA     | 76         |
|                     | Se-Caspase-6 R | 20     | 59 | 50  | AGTACTTGCGTGCTGCATTG    |            |
